# Supplementary material
Source: PubMed Central journal article supplement (PMC4685009)
Supplement: NIHMS734565-supplement-1.pdf [file NIHMS734565-supplement-1.pdf]

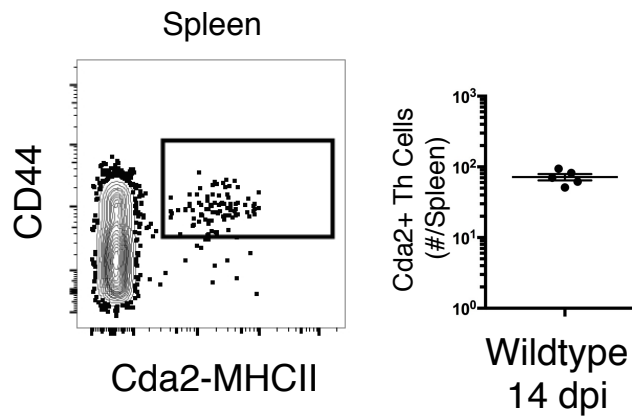

**Figure S1. Spleen is not a major contributor of antigen-specific Th cell priming to pulmonary cryptococcal infection.** Flow plot and composite graph of Chitin deacetylase 2 (Cda2)-MHCII tetramer binding, *Cryptococcus*-specific Th cells from the spleens of mice infected 14 days prior.

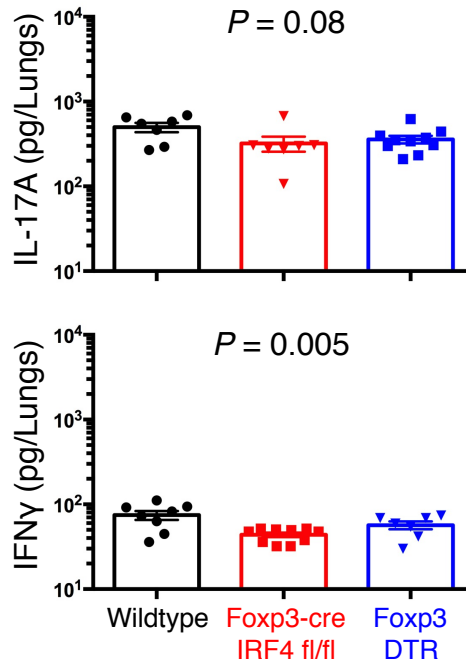

**Figure S2. Th17 and Th1 cell cytokines do not increase in the absence of Treg cell suppression.** Interleukin (IL)-17A and Interferon (IFN)- $\gamma$  measured in lung homogenates from wildtype, Foxp3-IRF4 fl/fl, and Foxp3-DTR mice 14 days post-infection. Global tests were by Kruskal-Wallis ANOVA. All data are presented as the mean  $\pm$  standard error of the mean and include 2 independent experiments.

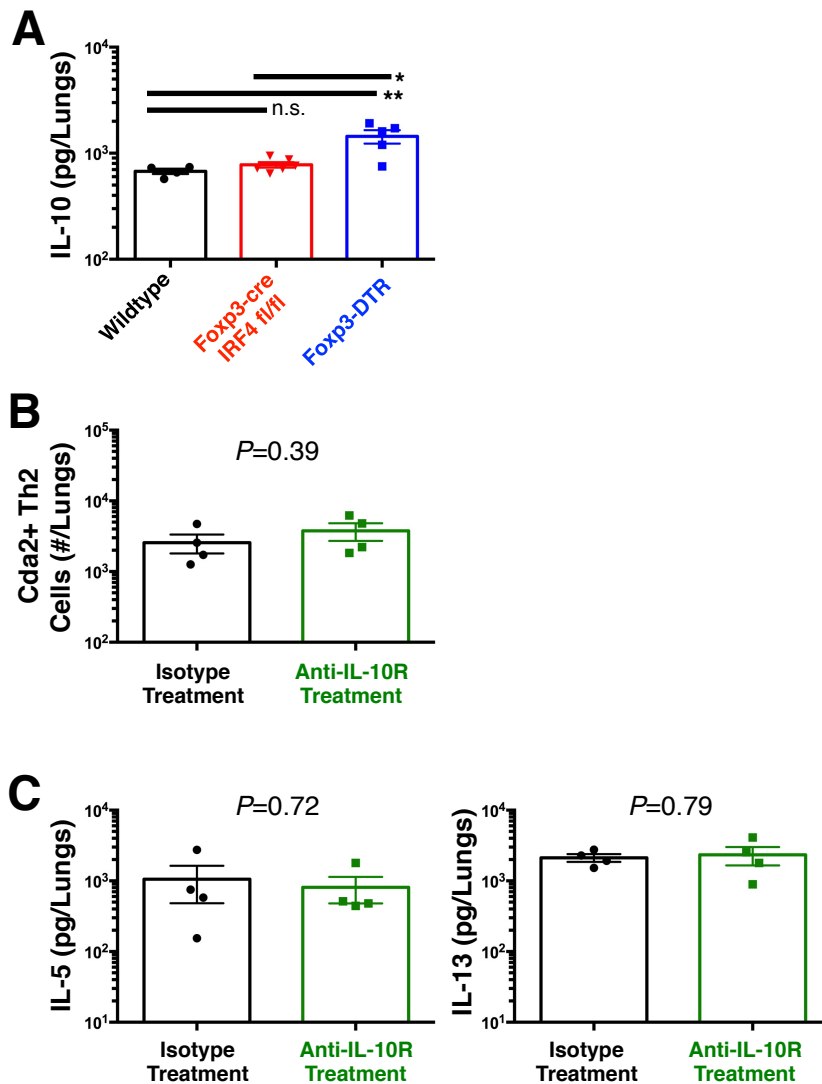

**Figure S3. IL-10 is dispensable for suppression of Th2 cells produced in response to pulmonary cryptococcal infection.** (A) Interleukin (IL)-10 measured in lung homogenates from wildtype, Foxp3-IRF4 fl/fl, and Foxp3-DTR mice 14 days post-infection. (B) Cda2+ Th2 cells quantified in the lungs of infected mice treated with IL-10 receptor blocking antibody or isotype control. (C). IL-5 (*left*) and IL-13 (*right*) measured in lung homogenates from infected mice treated with IL-10 receptor blocking antibody or isotype control. Pairwise comparisons were made by Man-Whitney U with Bonferoni adjustments for multiple comparisons. All data are presented as the mean  $\pm$  standard error of the mean.

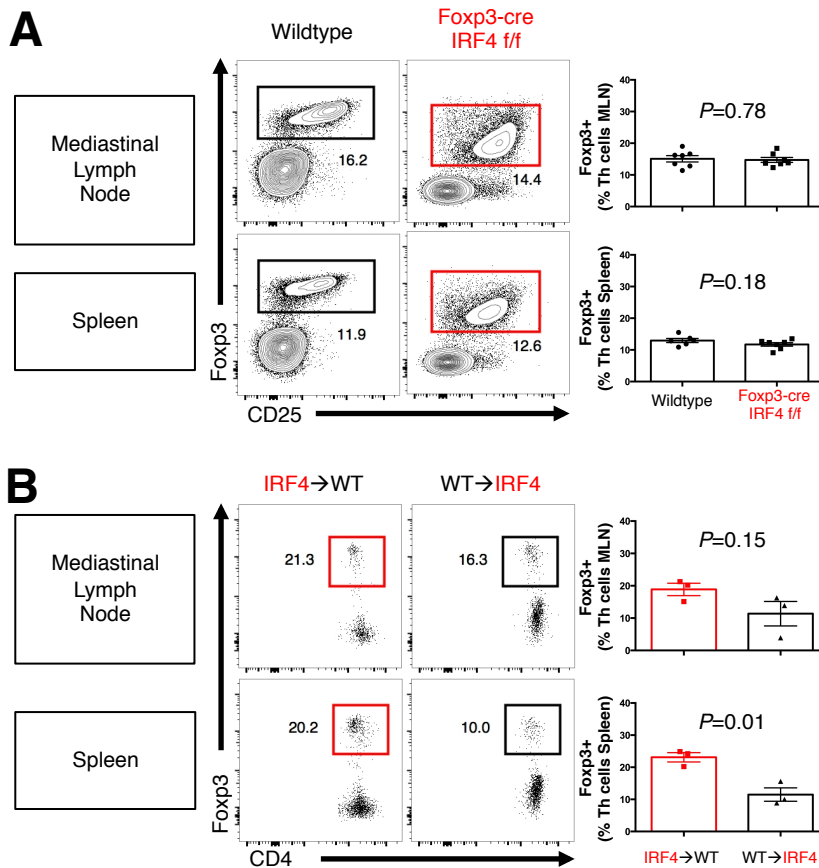

**Figure S4. IRF4-deficient Treg cell differentiation is unaffected in secondary lymphoid tissues.** (A) Flow cytometry plots and composite graphs of Th cells of mediastinal lymph nodes (MLN) and spleens from wildtype and Foxp3-cre IRF4 fl/fl mice infected 14 days prior. (B) Flow cytometry plots and composite graphs of Th cells of MLN and spleens from wildtype Th cells transferred into Foxp3-cre IRF4 fl/fl hosts or Foxp3-cre IRF4 fl/fl cells transferred into wildtype hosts infected 7 days prior and harvested 14 days post-infection. Red and black boxes on the plots are donor-derived cells that are also quantified in the composite graphs. Pairwise comparisons were made by Man-Whitney U. Plots are representative of 2 independent experiments. All data are presented as the mean  $\pm$  standard error of the mean.
